# Supplementary material for: Photocatalytic Degradation of Tetracycline by La-Fe Co-Doped SrTiO3/TiO2 Composites: Performance and Mechanism Study
Source: MDPI journal article supplement (doi:10.3390/w16020210), 2024-01-07
Supplement: s1 [file s1]

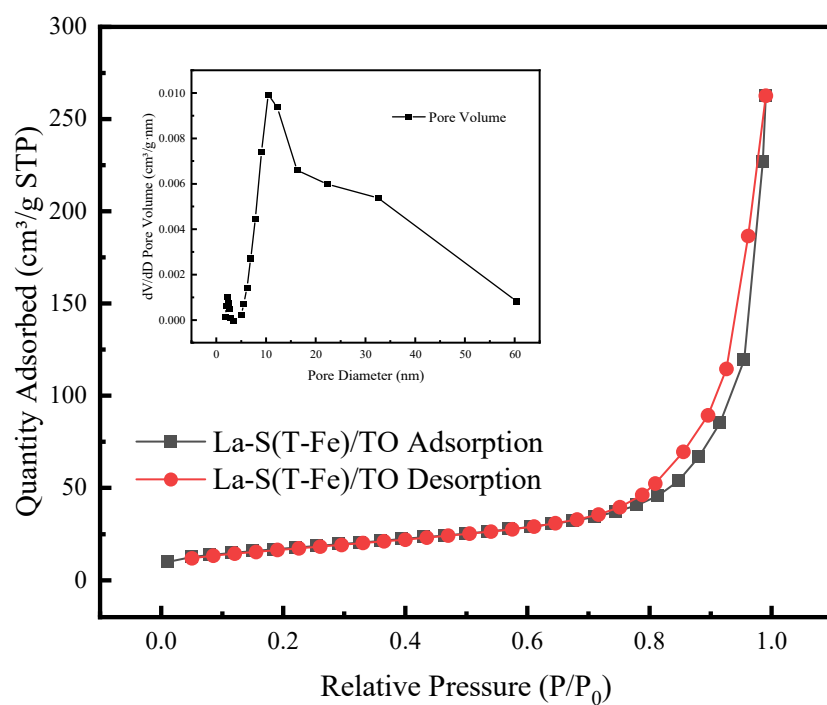

Figure S1. Nitrogen physisorption isotherm and pore size distribution (inset) of La-S(Ti-Fe)/TO

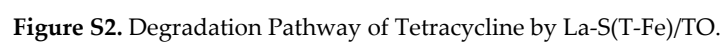

**Figure S2.** Degradation Pathway of Tetracycline by La-S(T-Fe)/TO.
